# 1        **A high-continuity and annotated tomato reference genome**

2

3        Xiao Su<sup>1</sup>, Baoan Wang<sup>1</sup>, Xiaolin Geng<sup>1</sup>, Yuefan Du<sup>1</sup>, Qinqin Yang<sup>1</sup>, Bin Liang<sup>1</sup>, Ge  
4        Meng<sup>1</sup>, Qiang Gao<sup>2</sup>, Sanwen Huang<sup>3</sup>, Wencai Yang<sup>1\*</sup>, Yingfang Zhu<sup>4\*</sup> and Tao Lin<sup>1\*</sup>

5

6        <sup>1</sup>State Key Laboratory of Agrobiotechnology, Beijing Key Laboratory of Growth and

7        Developmental Regulation for Protected Vegetable Crops, College of Horticulture, China

8        Agricultural University, 100193 Beijing, China

9        <sup>2</sup>Genomics and Genetic Engineering Laboratory of Ornamental Plants, College of Agriculture and

10        Biotechnology, Zhejiang University, 310058 Hangzhou, China

11        <sup>3</sup>Genome Analysis Laboratory of the Ministry of Agriculture, Agricultural Genomics Institute at

12        Shenzhen, Chinese Academy of Agricultural Sciences, 518124 Shenzhen, China

13        <sup>4</sup>State Key Laboratory of Crop Stress Adaptation and Improvement, School of Life Sciences,

14        Henan University, 475001 Kaifeng, China

15        Full list of author information is available at the end of the article

16        These authors contributed equally: Xiao Su, Baoan Wang, Xiaolin Geng

17        Correspondence: Wencai Yang ([yangwencai@cau.edu.cn](mailto:yangwencai@cau.edu.cn)), Yingfang Zhu ([zhuyf@henu.edu.cn](mailto:zhuyf@henu.edu.cn)) or

18        Tao Lin ([lintao35@cau.edu.cn](mailto:lintao35@cau.edu.cn))

19

## 20        **Abstract**

21        Genetic and functional genomics studies require a high-quality genome assembly.

22        Tomato (*Solanum lycopersicum*), an important horticultural crop, is an ideal model

23        species for the study of fruit development. Here, we assembled an updated reference

24        genome of *S. lycopersicum* cv. Heinz 1706 that was 799.09 Mb in length, containing

25        34,384 predicted protein-coding genes and 65.66% repetitive sequences. By

26        comparing the genomes of *S. lycopersicum* and *S. pimpinellifolium* LA2093, we found

27        a large number of genomic fragments probably associated with human selection,

28        which may have had crucial roles in the domestication of tomato. Our results offer

29        opportunities for understanding the evolution of the tomato genome and will facilitate

30 the study of genetic mechanisms in tomato biology. Information for the assembled  
31 genome SLT1.0 was deposited both into the Genome Warehouse (GWH) database  
32 (<https://bigd.big.ac.cn/gwh/>) in the BIG Data Center under Accession Number  
33 GWHBAUD00000000.

34

## 35 **Introduction**

36 Tomato (*Solanum lycopersicum*) is an important model plant for scientific  
37 researches on fruit development and quality(Meissner et al., 1997). The tomato  
38 cultivation area has increased by ~1 million hectares over the past decade, and the  
39 yield has increased from 155 million tons to 181 million tons (<http://www.fao.org>). As  
40 a nutritious vegetable that contributes to the human diet, tomato is reported to contain  
41 more health-promoting compounds such as lycopene than some other popular fruits.  
42 These compounds lower risk of cancer and maintain human health(Giovanucci,  
43 1999). Tomato was originally found mainly in the Andean mountains of South  
44 America. Its fruit weight and quality differ markedly among different horticultural  
45 groups, and wild tomatoes have smaller seeds and lower yields than cultivars.

46 A draft genome of the tomato cultivar Heinz 1706 produced using shotgun  
47 sequencing technology was released in 2012 (The Tomato Genome Consortium, 2012)  
48 and widely used as a reference genome for scientific researches. However, the  
49 fragmented nature of this genome and the resulting incomplete gene models could  
50 hindered the discovery and functional analysis of important genes. The completeness,  
51 accuracy, and contiguity of genome assemblies depend mainly on sequencing  
52 technology and assembly strategy. In the current genomic era, single-molecule  
53 real-time (SMRT) sequencing technology and new assembly pipelines have  
54 remarkably improved the quality of genome assemblies such as those of rice(Du et al.,  
55 2017), cucumber(Li et al., 2019), and tomato(Hosmani et al., 2019). Although these  
56 genome assemblies have accelerated some scientific researches, such as QTL  
57 mapping and transcriptome analysis, higher continuous and complete genome  
58 sequences are required for identification of large structural variations and gene  
59 mining.

60 In this study, we generated a highly continuous and complete genome sequence of  
61 Heinz 1706 (version SLT1.0) that contains many fewer gaps and unplaced contigs and  
62 demonstrates better assembly of repetitive regions. By comparing the genomes of *S.*  
63 *lycopersicum* and *S. pimpinellifolium* LA2093, we found a large number of genomic

64 fragments that appear to be likely involved in domestication. Our work offers new  
65 opportunities for understanding the evolutionary history of the tomato genome and the  
66 genetic mechanisms that underlie complex traits in tomato breeding.

67

## 68 Results and Discussion

### 69 High-quality genome assembly

70 We assembled a highly continuous and complete genome sequence of Heinz 1706  
71 using an integrated genome sequencing approach that combined 131.78 Gb (168.52×)  
72 of SMRT data, 226.97 Gb (290.24×) of BioNano data, 140.52 Gb (179.70×) of Hi-C  
73 data, and 50.93 Gb (61.53×) of Illumina short-read data (Supp Table 1). The PacBio  
74 long reads with an N50 read length of 32.82 kb were assembled with CANU  
75 software(Koren et al., 2017), generating a 875.21-Mb genome with a contig N50 of  
76 17.83 Mb (Table 1). To reduce fragmentation and fill in gaps, BioNano data and Hi-C  
77 data were used to assist with scaffold construction using Aigner and  
78 Assembler(Shelton et al., 2015), HERA(Du et al., 2019), and Juicer(Durand et al.,  
79 2016) software. A Hi-C-based physical heatmap comprising 12 groups was generated  
80 (Suppl. Figure 1) and used to create 12 pseudo-chromosomes that anchor ~790.59 Mb  
81 of the genome and harbor 97.61% (33,562) of the predicted protein-coding genes. The  
82 genome assembly was polished with Illumina short reads for error homozygous SNPs  
83 or indels using Pilon software(Walker et al., 2014). As a result, we generated a  
84 799.09-Mb genome assembly, SLT1.0 (Figure 1 and Table 1).

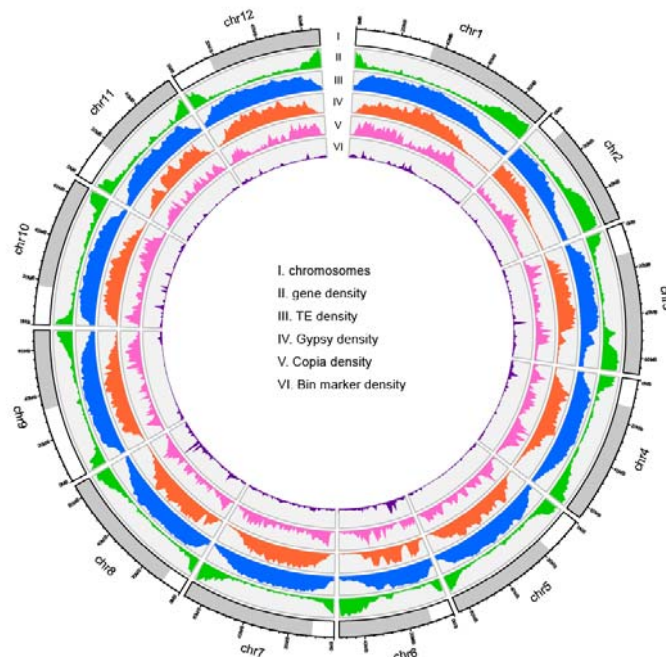

86 **Figure 1: Genomic landscape and structural variants of *S. lycopersicum* cv. Heinz 1706.** (i)

87 Ideogram of the 12 chromosomes with scale in Mb. (ii) Gene density (number of genes per Mb).

88 (iii) Repeat content (% nucleotides per Mb). (iv) *Gypsy* content (% nucleotides per Mb). (v) *Copia*

89 content (% nucleotides per Mb). (vi) Bin marker content (% nucleotides per Mb)

|                                         | <b>SLT1.0</b> | <b>SL4.0</b> | <b>SL3.0</b> |
|-----------------------------------------|---------------|--------------|--------------|
| Genome assembly (Mb)                    | 799.09        | 782.52       | 828.08       |
| Non-N bases                             | 797,955,212   | 782,475,302  | 746,357,470  |
| Number of gaps                          | 210           | 286          | 22,700       |
| Number of total contigs                 | 1,615         | 504          | -            |
| Longest contig length (Mb)              | 47.16         | 26.29        | -            |
| N50 of contigs (Mb)                     | 17.83         | 6.01         | -            |
| Number of unplaced contigs              | 112           | 176          | 4,374        |
| Unplaced contigs sequence length (Mb)   | 8.50          | 9.64         | 20.85        |
| Number of genes                         | 34,384        | 34,075       | 35,768       |
| Percentage of gene length in genome (%) | 16.21         | 15.56        | 17.33        |
| Mean gene length (bp)                   | 3,766.53      | 3,572.44     | 4,011.09     |
| Gene density (per Mb)                   | 43.03         | 43.55        | 43.19        |
| Mean coding sequence length (bp)        | 223.02        | 228.01       | 219.97       |
| Mean exon length (bp)                   | 310.11        | 275.03       | 308.36       |
| Mean intron length (bp)                 | 270.41        | 606.69       | 632.38       |
| Masked repeat sequence length (Mb)      | 558.49        | 546.95       | 507.14       |
| Repeats percentage of genome size (%)   | 69.89         | 69.90        | 61.24        |

90 **Table 1: Genome assembly and annotation of SLT1.0**

91

92 The conserved genes from the Benchmarking Universal Single-Copy Orthologs  
 93 (BUSCO) gene set (Simao et al., 2015) were used to gauge the accuracy and  
 94 completeness of the SLT1.0 assembly. The results showed that the SLT1.0 assembly  
 95 contained 97.70% complete genes and 0.30% fragmented genes. The value of the LTR  
 96 Assembly Index (LAI) was 12.41, which was consistent with that of the previously  
 97 released SL4.0 tomato reference genome (LAI 12.54). More than 99.88% of the  
 98 genome assembly had greater than one-fold coverage with Illumina short reads. All  
 99 these evidences demonstrated the high continuity and completeness of the SLT1.0  
 100 genome assembly.

101

102 **High-quality genome annotation**

103        Except for *ab initio* prediction and protein-homology-based prediction, we also  
104        used transcriptome data, including the bulked RNA-seq data with a mapping rate of  
105        99.73%, and previously-released RNA-seq data from various tissues (The Tomato  
106        Genome Consortium, 2012) with a mapping rate of 97.97%, to facilitate gene  
107        annotation of the assembled genome. In total, we predicted 34,384 protein-coding  
108        genes with an average length of 3,766.53 bp and 6.55 exons per gene in the SLT1.0  
109        genome (Table 1 and Supp Table 2). Gene completeness was estimated to be 98.20%  
110        based on the BUSCO gene set (Simao et al., 2015), and the protein-coding genes were  
111        unevenly distributed along the chromosomes (Figure 1). Comparative analysis  
112        showed that 234 genes in the SLT1.0 genome corresponded to 488 genes in the SL4.0  
113        genome (Supp Table 3). Gene collinearity analysis identified 33 collinear gene blocks  
114        between the SLT1.0 and SL4.0 genomes, harboring 28,892 (84.03%) and 28,389  
115        (83.30%) homologous genes, respectively (Figure 2A). Some unplaced contigs in the  
116        SL4.0 genome were successfully assigned to chromosomes in the SLT1.0 genome.  
117        These results highlight the high accuracy and completeness of the SLT1.0 genome  
118        assembly and gene models.

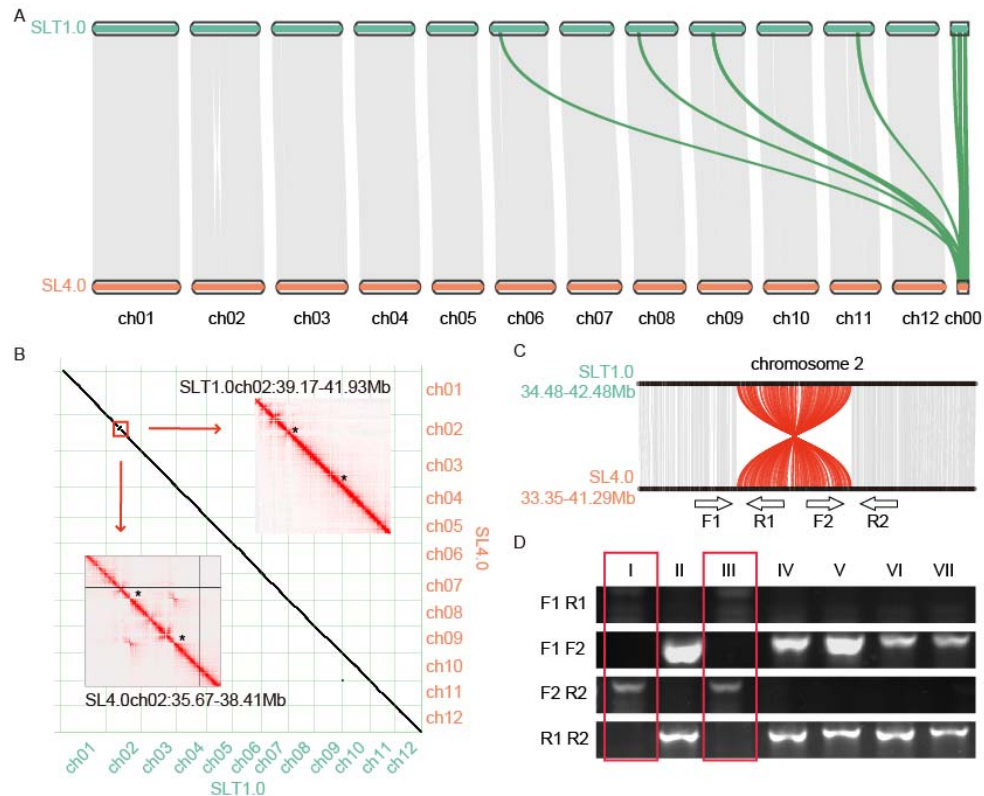

119

120 **Figure 2: Alignment between the Heinz 1706 SLT1.0 and SL4.0 genomes.**

121 collinearity analysis showed that four scaffolds from SL4.0 are placed on chromosomes of the

122 SLT1.0 genome and that there is an inversion on chromosome 2. **B** The color intensity of the Hi-C

123 heatmap represents the number of links between two 25-kb windows. The presence of an

124 inversion is supported by high-density contacts indicated by two asterisks in the Hi-C heatmap

125 generated from SL4.0 Hi-C reads (lower left), whereas no corresponding contact is found in the

126 SLT1.0 Hi-C heatmap (upper right). **C** The inversion shown in red on chromosome 2. F1, R1, F2,

127 and R2 are primers around the break points. **D** Seven Heinz 1706 individuals were identified, two

128 of which (I, III) had inversions

129

130 A comprehensive analysis of the genome sequences identified 965 collinear

131 chromosomal blocks between the SLT1.0 and SL4.0 genomes. These blocks contained

132 32,922 and 32,554 genes, accounting for 95.75% and 95.54% of the SLT1.0 and

133 SL4.0 genomes, respectively. However, we detected a 2.76 Mb inversion from 39.17

134 to 41.93 Mb on chromosome 2 of the SLT1.0 genome (Figure 2B). The continuous



135 interaction signals on the Hi-C heatmap, as well as PCR and Sanger sequencing,  
136 showed that this region was not misassembled (Figure 2B, C and Supp Table 4). This  
137 result indicated that heterozygous variation may exist in the previously reported Heinz  
138 1706 accession.

139

#### 140 **Transposable element analysis**

141 A total of 524.84 Mb of repetitive sequences were identified, accounting for 65.66%  
142 of the SLT1.0 genome assembly, which was similar to that reported in the SL4.0  
143 genome (508.89 Mb, 65.03%) (Supp Table 5). Among these repetitive sequences, long  
144 terminal repeats (LTRs) were the predominant TE family, covering 50.25% (401.60  
145 Mb) of the genome. *Gypsy*-type LTRs (344.52 Mb) were the most common subfamily  
146 and six times more abundant than *Copia*-type LTRs (50.09 Mb). We used a  
147 combination of methods, including LTR-FINDER(Xu et al., 2007),  
148 LTR-Harvest(Ellinghaus et al., 2008), and LTR-Retriever(Ou et al., 2018), to identify  
149 intact LTRs. A total of 3,220 LTRs were detected in the SLT1.0 genome assembly,  
150 including 1,553 *Gypsy*-type LTRs and 1,346 *Copia*-type LTRs. The estimated  
151 insertion time of the LTR retrotransposons showed that *Gypsy* and *Copia*-type LTRs  
152 had a recent and similar burst 0.60-1.00 million years ago (Mya) (Figure 3A), and  
153 were enriched far from coding genes (Figure 3B). These results indicated that the  
154 burst of *Gypsy*-type LTRs may be the major driving force for the expansion of the  
155 tomato genome.

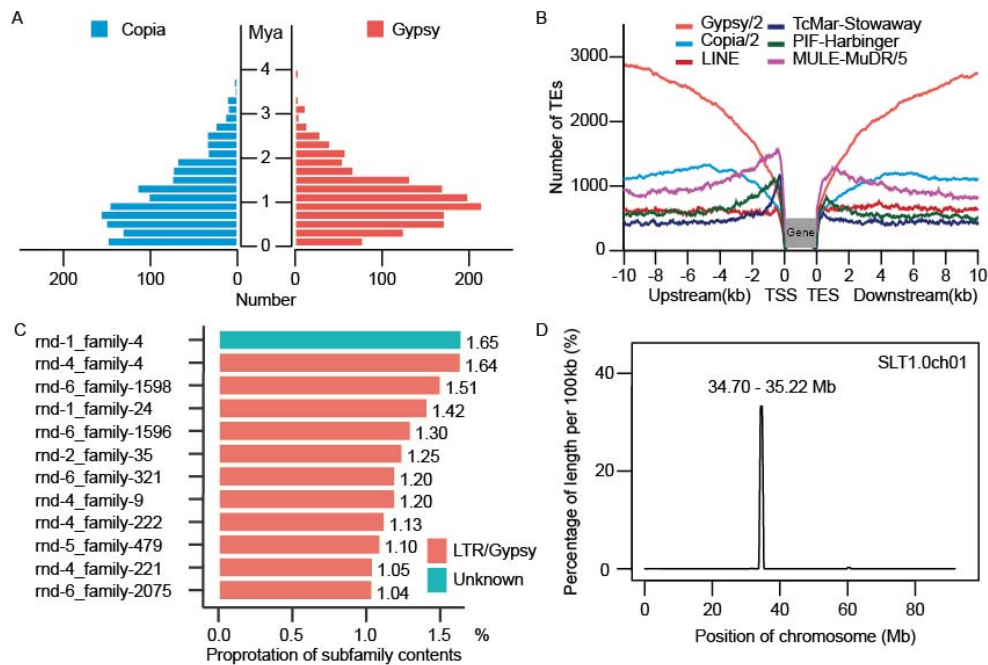

156

157 **Figure 3: Repetitive sequence analysis.** **A** The estimated insertion time of LTR retrotransposons,  
 158 showing *Gypsy* and *Copia*-type LTRs. **B** Frequencies of transposable elements (TE) in the vicinity  
 159 of genes. **C** The top 12 TE subfamilies, including 11 *Gypsy* and one *Unknown*-type subfamily. **D**  
 160 The *Unknown*-type rmd-1\_family-4 subfamily was enriched towards the centromere of  
 161 chromosome 1

162

163 To identify the centromere regions, we detected the top 12 TE subfamilies,  
 164 including 11 *Gypsy* and one unknown-type subfamilies, which together comprised  
 165 over 15.47% of the genome (Figure 3C). The density of these TE subfamilies along  
 166 all the chromosomes showed that only the *Unknown*-type rmd-1\_family-4 subfamily  
 167 (1.65% of the genome) was enriched near centromeres but absent from the rest of the  
 168 genome (Figure 3D and Suppl. Figure 2). In addition, we found that 65.21% of the  
 169 unanchored Contig/Scaffold sequence length comprised highly repetitive regions.  
 170 Overall, we predicted 12 potential centromeric regions ranging from 1.90 to 6.90 Mb  
 171 on the 12 chromosomes.

### 172 Comparison of the SLT1.0 and *S. pimpinellifolium* LA2093 genomes

173 Structural variations (SVs) between wild and cultivated species can cause many

174 phenotypic differences in domestication traits such as fruit weight and quality(Jin et  
175 al., 2019). Based on protein homologies between the SLT1.0 and LA2093 genomes,  
176 we found that 23,544 genes (68.47%) in the SLT1.0 genome had one-to-one collinear  
177 relationships with 23,474 genes (65.64%) in the LA2093 genome (Figure 4A). In  
178 addition, genome collinearity analysis showed that syntenic genomic blocks occupied  
179 95.63% of the SLT1.0 genome and 96.67% of the LA2093 genome, respectively. We  
180 also identified 6,647 SVs (more than 1 kb in length) between the SLT1.0 and LA2093  
181 genomes, including 3,054 (45.95%) SVs in 2,862 genes (Figure 4B). GO analysis  
182 showed that these genes were significantly enriched in the function of  
183 oxidation-reduction process, photosynthetic electron transport chain and  
184 proton-transporting ATP synthase complex (Suppl. Figure 3). We also identified  
185 4,493,889 SNPs and 2,459,597 indels between the two genomes (Figure 4B),  
186 including 418,844 SNPs and 245,310 indels located in 29,862 genes. We noted that  
187 45,229 nonsynonymous SNPs resided in 18,178 genes and 9,148 frameshift indels in  
188 1,559 genes, including 7,788 located in domestication regions(Lin et al., 2014). They  
189 were significantly enriched in macromolecular complex, pigment metabolic process,  
190 nutrient reservoir activity, and intracellular organelle parts (Figure 4C), suggesting  
191 these genes may have contributed to disease resistance and fruit traits during tomato  
192 domestication.

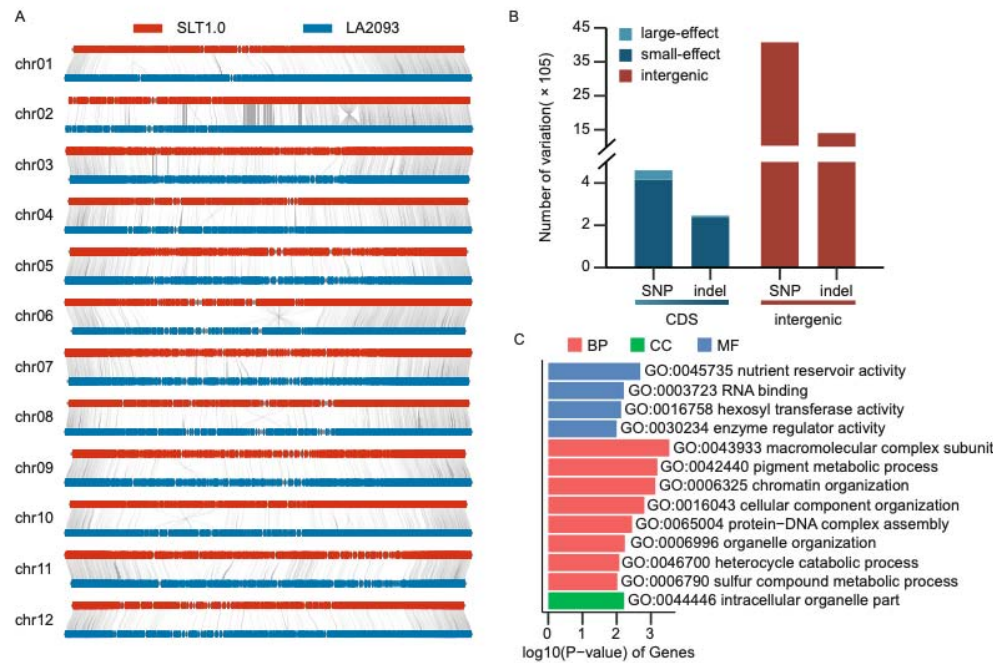

193

194 **Figure 4: Alignment between the SLT1.0 and *S. pimpinellifolium* LA2093 genomes.** A The red

195 bar represents the SLT1.0 chromosome, and the blue bar represents the LA2093 chromosome. B

196 Numbers of SNPs with nonsynonymous mutations (large-effect), SNPs with synonymous

197 mutations (small-effect), and SNPs in intergenic regions, as well as the number of non-triple

198 (large-effect) indels, triple (small-effect) indels, and indels in intergenic regions. C GO terms

199 enriched in genes affected by SNPs and indels selected during domestication

200

## 201 Conclusion

202 A highly contiguous and complete genome assembly is a powerful tool for

203 molecular genetic studies of agronomic traits in tomato. In this study, we combined

204 PacBio, BioNano, and Hi-C data to produce the high-quality SLT1.0 tomato genome.

205 The 799.09-Mb assembly had an N50 of 17.83 Mb, and more than 98.94% of its

206 sequences were anchored to 12 chromosomes. The SLT1.0 genome had more repeats

207 were sorted and anchored to chromosomes than the previously released SL4.0 genome.

208 Analysis of repeat subfamilies showed that a specific subfamily, rnd-1\_family-4, was

209 found in centromeric regions of the SLT1.0 genome. We could not find a similar

210 reliable repeat family in the SL4.0 genome. Comparative genome analysis revealed

211 that a 2.76-Mb inversion was present on chromosome 2 in SLT1.0 relative to SL4.0  
212 (Figure 2). The inversion was validated by Sanger sequencing and contained no  
213 functional genes in adjacent breakpoints, suggesting it is a continuous fragment that  
214 has no effect on the SLT1.0 genome. However, we must be cautious and further verify  
215 these different fragments between the SLT1.0 and SL4.0 genomes.

216 Overall, we produced a high-quality tomato genome that will facilitate the  
217 molecular dissection of important agronomic traits in tomato. This high-quality  
218 genome will be powerful tools for tomato breeding and can deepen our understanding  
219 of tomato biology.

220

## 221 **Acknowledgements**

222 This work was supported by the 111 Project (B17043), the Beijing Municipal  
223 Education Commission Construction of Beijing Science and Technology Innovation  
224 and Service Capacity in Top Subjects (grant CEFF-PXM2019\_014207\_000032), the  
225 National Key Research and Development Program of China (2019YFD1000300) and  
226 the National Natural Science Foundation of China (32072571).

227

## 228 **Methods**

### 229 **Plant materials and sequencing**

230 Plants were grown in the greenhouse in China Agricultural University in Beijing,  
231 with a 16 h light/ 8 h dark cycle. A PacBio SMRT library was constructed and  
232 sequenced on the PacBio Sequel II platform. A Hi-C library was prepared following  
233 the Proximo Hi-C plant protocol with HindIII as the restriction enzyme for chromatin  
234 digestion. The Hi-C libraries were sequenced on the Illumina NovaSeq platform with  
235 a read length of 150 bp. For optical mapping, high-molecular-weight DNA was  
236 isolated and labeled using a Bionano Saphyr System.

237

### 238 ***De novo* genome assembly**

239 The raw SLT1.0 SMRT reads were corrected and assembled into sequence contigs

240 using CANU with default parameters. The contigs were used for HERA assembly  
241 with the corrected SMRT reads. To identify sequence overlaps, all contigs and  
242 corrected reads were aligned all-against-all using Minimap2(Li, 2018) and BWA(Li et  
243 al., 2009) with default parameters. The HERA-assembled super-contigs were  
244 combined with BioNano genome maps to generate hybrid maps using IrysView  
245 software (BioNano Genomics) with a minimum length of 150 kb. The resulting  
246 contigs were further clustered basing on the Hi-C data using 3D-DNA  
247 software(Dudchenko et al., 2017). Pilon(Walker et al., 2014) was used for further  
248 error correction.

249

### 250 **Repeat analysis and gene annotation**

251 The integrity of the final genome assembly was assessed in conjunction with  
252 BUSCO (v4.1.4)(Simao et al., 2015) using Benchmarking Universal Single-Copy  
253 Orthologs. A combination of *de novo* and homology-based methods was used to  
254 identify interspersed transposable elements (TEs). A *de novo* repeat library was built  
255 using RepeatModeler (v2.0.1)(Bao et al., 2002) and LTR\_retriever (v2.9.0)(Ou et al.,  
256 2018). Both the *de novo* library and RepBaseRepeatMaskerEdition-20181026, which  
257 is the most commonly used repetitive DNA element database, were used to identify  
258 TEs with RepeatMasker (v4.1.0)(Graovac et al., 2009).

259 The RNA-Seq reads from this study were used to predict protein-coding genes in  
260 the repeat-masked SLT1.0 genome(The Tomato Genome Consortium, 2012). The  
261 cleaned high-quality RNA-Seq reads were aligned to the assembled genome using  
262 HISAT2(Kim et al., 2019) with default parameters, and the read alignments were  
263 assembled into transcripts using StringTie(Pertea et al., 2015). The complete coding  
264 sequences (CDS) were predicted from the assembled transcripts by the PASA  
265 pipeline(Haas et al., 2003). The BRAKER(Hoff et al., 2019),  
266 GeneMark-ET(Alexandre et al., 2014), and SNAP(Korf, 2004) softwares were  
267 performed on *ab initio* gene predictions. Finally, high-confidence gene models were  
268 predicted by integrating *ab initio* predictions, transcript mapping, and protein  
269 homology evidence with the MAKER pipeline(Cantarel et al., 2008).

270

271 **Genome comparisons and SV identification**

272 Genome comparisons between SLT1.0 and SL4.0 and between SLT1.0 and LA2093  
273 were performed via whole-genome alignment using the MUMmer package  
274 (v3.23)(Kurtz et al., 2004). The one-to-one alignment blocks were identified using  
275 delta-filter program. Then the show-snp tools were used to identify SNPs and indels  
276 using uniquely aligned fragments, and the show-diff tool statistics were used to screen  
277 for structural variations over 1 kb in length. The SnpEff(Cingolani et al., 2012)  
278 software was used to analyze the various SNPs and indel types on the chromosomes.

279

280

## 281 **References**

- 282 Alexandre, L., Burns, P.D. and Mark, B. (2014). Integration of mapped RNA-Seq reads into  
283 automatic training of eukaryotic gene finding algorithm. *Nucleic Acids Res* 119-119.
- 284 Bao and Z. (2002). Automated de novo identification of repeat sequence families in sequenced  
285 genomes. *Genome Res* 12, 1269-1276.
- 286 Cantarel, B.L., Korf, I., Robb, S.M.C., Parra, G., Ross, E., Moore, B., Holt, C., Alvarado, A.S. and  
287 Yandell, M. (2008). MAKER: An easy-to-use annotation pipeline designed for emerging  
288 model organism genomes. *Genome Res* 18, 188-196.
- 289 Cingolani, P., Platts, A., Wang, L.L., Coon, M., Nguyen, T., Wang, L., Land, S.J., Lu, X. and  
290 Ruden, D.M. (2012). A program for annotating and predicting the effects of single  
291 nucleotide polymorphisms, SnpEff. *Fly* 6, 80-92.
- 292 The Tomato Genome Consortium (2012). The tomato genome sequence provides insights into  
293 fleshy fruit evolution. *Nature* 485, 635-641.
- 294 Du, H. and Liang, C. (2019). Assembly of chromosome-scale contigs by efficiently resolving  
295 repetitive sequences with long reads. *Nat Commun* 10, 5360.
- 296 Du, H., Yu, Y., Ma, Y., Gao, Q., Cao, Y., Chen, Z., Ma, B., Qi, M., Li, Y., Zhao, X., et al. (2017).  
297 Sequencing and de novo assembly of a near complete indica rice genome. *Nat Commun*  
298 8.
- 299 Dudchenko, O., Batra, S.S., Omer, A.D., Nyquist, S.K., Hoeger, M., Durand, N.C., Shamim, M.S.,  
300 Machol, I., Lander, E.S., Aiden, A.P., et al. (2017). De novo assembly of the *Aedes*  
301 *aegypti* genome using Hi-C yields chromosome-length scaffolds. *Science* 356, 92-95.
- 302 Durand, N.C., Shamim, M.S., Machol, I., Rao, S.S.P., Huntley, M.H., Lander, E.S. and Aiden, E.L.  
303 (2016). Juicer provides a one-click system for analyzing loop-resolution Hi-C  
304 experiments. *Cell Systems* 3, 95-98.
- 305 Ellinghaus, D., Kurtz, S. and Willhoeft, U. (2008). LTRharvest, an efficient and flexible software  
306 for de novo detection of LTR retrotransposons. *BMC Bioinformatics* 9, 18.
- 307 Giovannucci, E. (1999). Tomatoes, tomato-based products, lycopene, and cancer: Review of the  
308 epidemiologic literature. *JNCI-J Natl Cancer Inst* 91, 317-331.
- 309 Graovac, M.T. and Chen, N. (2009). Using RepeatMasker to identify repetitive elements in  
310 genomic sequences. *Current Protocols in Bioinformatics* 25.
- 311 Haas, B.J., Delcher, A.L., Mount, S.M., Wortman, J.R., Smith, R.K., Hannick, L.I., Maiti, R.,  
312 Ronning, C.M., Rusch, D.B., Town, C.D., et al. (2003). Improving the *Arabidopsis*  
313 genome annotation using maximal transcript alignment assemblies. *Nucleic Acids Res* 31,  
314 5654-5666.
- 315 Hoff, K.J., Lomsadze, A., Borodovsky, M. and Stanke, M. (2019), Whole-Genome Annotation  
316 with BRAKER. In *Gene Prediction: Methods and Protocols*, Kollmar, M., 65-95.
- 317 Hosmani, P.S., Flores Gonzalez, M., van de Geest, H., Maumus, F., Bakker, L.V., Schijlen, E., van  
318 Haarst, J., Cordewener, J., Sanchez Perez, G., Peters, S., et al. (2019). An improved de  
319 novo assembly and annotation of the tomato reference genome using single-molecule  
320 sequencing, Hi-C proximity ligation and optical maps. *bioRxiv* 767764.
- 321 Jin, L., Zhao, L., Wang, Y., Zhou, R., Song, L., Xu, L., Cui, X., Li, R., Yu, W. and Zhao, T. (2019).  
322 Genetic diversity of 324 cultivated tomato germplasm resources using agronomic traits  
323 and InDel markers. *Euphytica* 215, 69.



- 324 Kim, D., Paggi, J.M., Park, C., Bennett, C. and Salzberg, S.L. (2019). Graph-based genome  
325 alignment and genotyping with HISAT2 and HISAT-genotype. *Nat Biotechnol* 37,  
326 907–915
- 327 Koren, S., Walenz, B.P., Berlin, K., Miller, J.R., Bergman, N.H. and Phillippy, A.M. (2017). Canu:  
328 scalable and accurate long-read assembly via adaptive k-mer weighting and repeat  
329 separation. *Genome Res* 27, 722-736.
- 330 Korf, I. (2004). Gene finding in novel genomes. *BMC Bioinformatics* 5, 9.
- 331 Kurtz, S., Phillippy, A., Delcher, A.L., Smoot, M., Shumway, M., Antonescu, C. and Salzberg, S.L.  
332 (2004). Versatile and open software for comparing large genomes. *Genome Biol* 5, R12.
- 333 Li, H. (2018). Minimap2: pairwise alignment for nucleotide sequences. *Bioinformatics* 18.
- 334 Li, H. and Durbin, R. (2009). Fast and accurate short read alignment with Burrows-Wheeler  
335 transform. *Bioinformatics* 25, 1754-1760.
- 336 Li, Q., Li, H., Huang, W., Xu, Y., Zhou, Q., Wang, S., Ruan, J., Huang, S. and Zhang, Z. (2019). A  
337 chromosome-scale genome assembly of cucumber (*Cucumis sativus* L.). *GigaScience* 8.
- 338 Lin, T., Zhu, G., Zhang, J., Xu, X., Yu, Q., Zheng, Z., Zhang, Z., Lun, Y., Li, S., Wang, X., et al.  
339 (2014). Genomic analyses provide insights into the history of tomato breeding. *Nat Genet*  
340 46, 1220-1226.
- 341 Meissner, R., Jacobson, Y., Melamed, S., Levyatuv, S., Shalev, G., Ashri, A., Elkind, Y. and Levy,  
342 A. (1997). A new model system for tomato genetics. *Plant J* 12, 1465-1472.
- 343 Ou, S. and Jiang, N. (2018). LTR\_retriever: A Highly Accurate and Sensitive Program for  
344 Identification of Long Terminal Repeat Retrotransposons. *Plant Physiology* 176,  
345 1410-1422.
- 346 Perteua, M., Perteua, G.M., Antonescu, C.M., Chang, T.-C., Mendell, J.T. and Salzberg, S.L. (2015).  
347 StringTie enables improved reconstruction of a transcriptome from RNA-seq reads. *Nat*  
348 *Biotechnol* 33, 290–295.
- 349 Shelton, J.M., Coleman, M.C., Hemdon, N., Lu, N., Lam, E.T., Anantharaman, T., Sheth, P. and  
350 Brown, S.J. (2015). Tools and pipelines for BioNano data: molecule assembly pipeline  
351 and FASTA super scaffolding tool. *BMC Genomics* 16, 734.
- 352 Simao, F.A., Waterhouse, R.M., Ioannidis, P., Kriventseva, E.V. and Zdobnov, E.M. (2015).  
353 BUSCO: assessing genome assembly and annotation completeness with single-copy  
354 orthologs. *Bioinformatics* 31, 3210-3212.
- 355 Walker, B.J., Abeel, T., Shea, T., Priest, M., Abouelliel, A., Sakthikumar, S., Cuomo, C.A., Zeng,  
356 Q., Wortman, J., Young, S.K., et al. (2014). Pilon: an integrated tool for comprehensive  
357 microbial variant detection and genome assembly improvement. *PLoS One* 9.
- 358 Xu, Z. and Wang, H. (2007). LTR\_FINDER: an efficient tool for the prediction of full-length LTR  
359 retrotransposons. *Nucleic Acids Res* 35, 265-268.
- 360
- 361

362 **Supplementary Legends**

363 **Supplementary Figure 1: Hi-C heatmap of the SLT1.0 genome. The heatmap**  
364 **represents the normalized contact matrix.**

365 **Supplementary Figure 2: The *Unknown-type* rnd-1\_family-4 subfamily was**  
366 **enriched towards the centromere.**

367 **Supplementary Figure 3: The  $\log_{10}(P\text{-value})$  of genes in the domestication region**  
368 **with SV were analyzed by GO enrichment.**

369 **Supplementary Table 1: Genomic libraries used for genome assembly of Heinz**  
370 **1706.**

371 **Supplementary Table 2: Statistics of gene structure among cultivated and wild**  
372 **tomatoes.**

373 **Supplementary Table 3: Different gene between the SLT1.0 and SL4.0 genomes.**

374 **Supplementary Table 4: The primer information on chromosome 2 used to**  
375 **analysis the inversion.**

376 **Supplementary Table 5: Summary of repeats content in the SLT1.0 genome.**
