# Supplementary material for: A high-continuity and annotated tomato reference genome
Source: bioRxiv or medRxiv preprint supplement (doi:10.1101/2021.05.04.441887), 2021-05-05

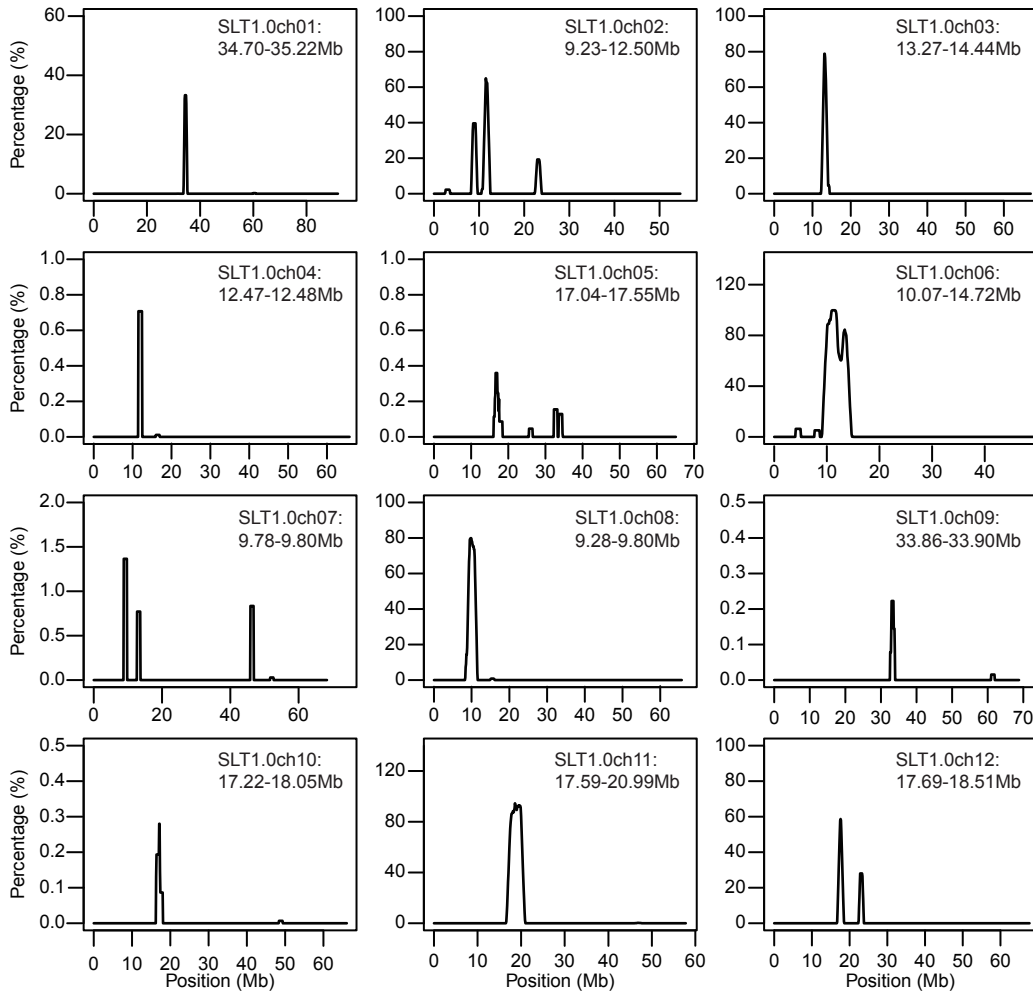

Supplement: Supplementary file [file media-2.pdf]
